# Supplementary material for: Metabolomics-based study of potential biomarkers of sepsis
Source: Research Square preprint supplement (doi:10.21203/rs.3.rs-2006661/v1), 2022-09-15
Supplement: Supplementary file 2 [file cce7fa5b179a8cf4f435dc77.docx]

**Supplementary Table S1. Metabolite number statistics table**

| node | node | pos |
| --- | --- | --- |
| Total ion number | 7485 | 668 |
| RSD<=30% ion number | 6807 | 652 |
| Ratio (%) | 90.94 | 97.6 |

Table S1 The ratio in the figure indicates that the number of metabolites with CV less than or equal to 30% of the relative peak area in QC samples is the ratio of all detected metabolites.
